# Supplementary material for: Functional Characterization of a Spectrum of Novel Romano-Ward Syndrome KCNQ1 Variants
Source: MDPI journal article supplement (doi:10.3390/ijms24021350), 2023-01-10
Supplement: s1 [file s1]

## Supplementary Figure S1

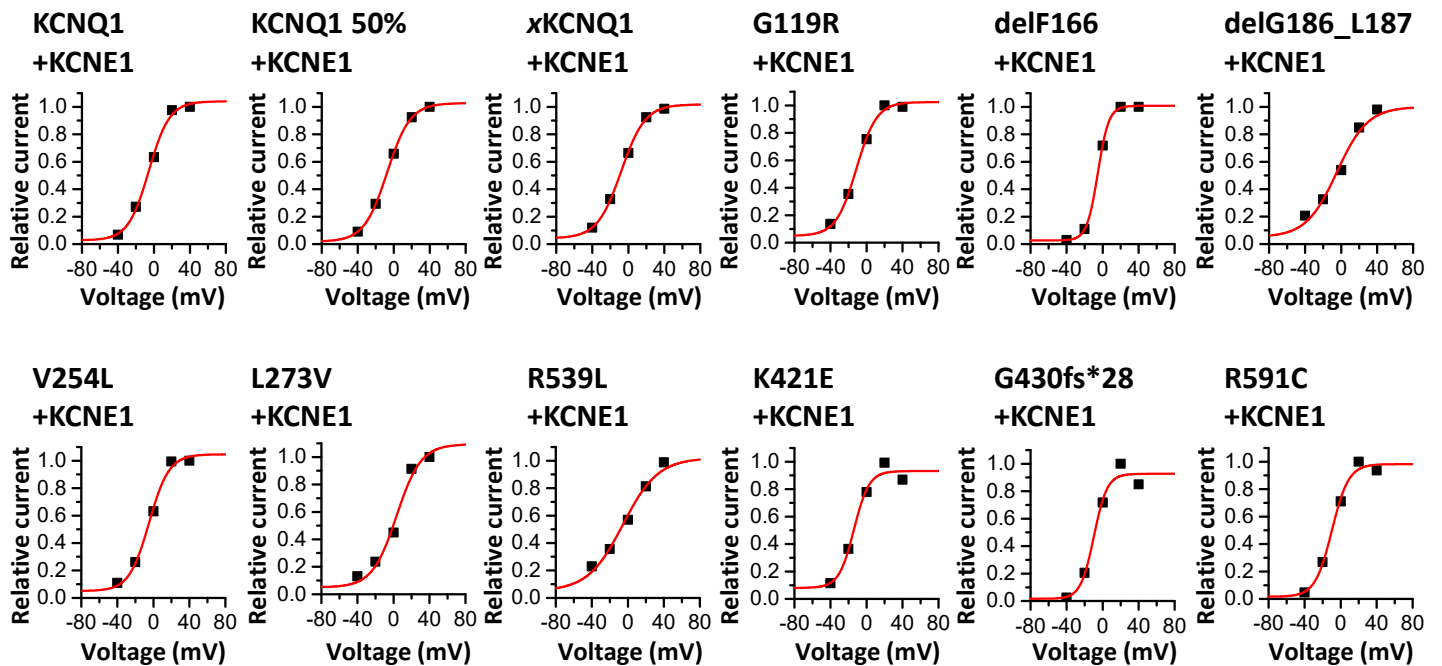

**Supplementary Figure S1.** Representative examples of the conductance-voltage (G/V) relationships for the different KCNQ1 variants. Recordings were performed with the protocol as described in Figure 6. The tail currents recorded after the 7 s pulse were normalized to the respective maximal tail current of each recording to obtain the conductance-voltage (G/V) curves. Normalized tail currents were fitted to a Boltzmann equation.

## Supplementary Figure S2

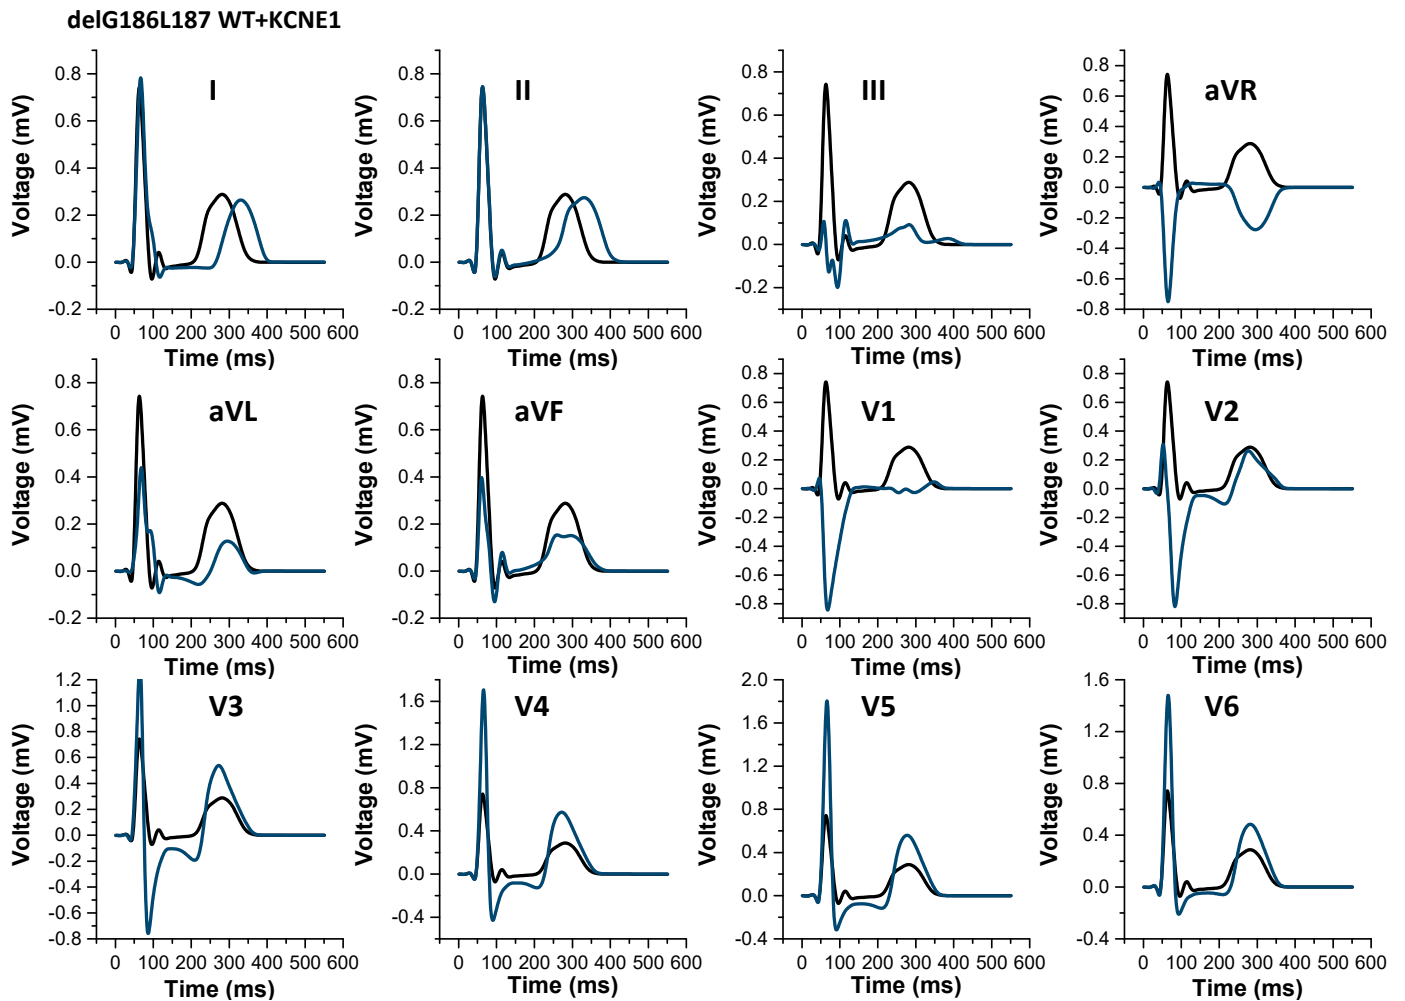

**Supplementary Figure S2.** 12-lead ECG modelling of wild-type KCNQ1+KCNE1 and the delG186\_L187 variant. Lead I to lead V6 were calculated and plotted for wild-type KCNQ1 + KCNE1 (black) or the G186\_187 variant (blue).

**Supplementary Table S1:** Simulation parameters for the *in silico* ECG computation. The scaling factors for the repolarization gradients were applied as described by Gillette *et al.* [1].

| Feature                     | Parameter                                                                | Value                                               |
|-----------------------------|--------------------------------------------------------------------------|-----------------------------------------------------|
| Conduction velocities       | Transversal CV in myocardium                                             | $CV_{m,t} = 0.3\text{m/s}$                          |
|                             | Longitudinal CV in myocardium                                            | $CV_{m,l} = 0.6\text{m/s}$                          |
|                             | Transversal CV in subendocardial layer                                   | $CV_{SE,t} = 1.1\text{m/s}$                         |
|                             | Longitudinal CV in subendocardial layer                                  | $CV_{SE,l} = 1.1\text{m/s}$                         |
| Initially activated regions | Left ventricular anterior stimulus, Position in ventricular coordinates  | $LV_{ant,ab} = 0.3042$<br>$LV_{ant,rot} = 0.4750$   |
|                             | Left ventricular anterior stimulus, delay                                | $LV_{ant,t} = 9.62\text{ms}$                        |
|                             | Left ventricular anterior stimulus, radius                               | $LV_{ant,r} = 19.29\text{mm}$                       |
|                             | Left ventricular posterior stimulus, Position in ventricular coordinates | $LV_{post,ab} = 0.6250$<br>$LV_{post,rot} = 0.1500$ |
|                             | Left ventricular posterior stimulus, delay                               | $LV_{post,t} = 4.25\text{ms}$                       |
|                             | Left ventricular posterior stimulus, radius                              | $LV_{post,r} = 14.33\text{mm}$                      |
|                             | Right ventricular stimulus, Position in ventricular coordinates          | $RV_{ab} = 0.4208$<br>$RV_{rot} = 0.7000$           |
|                             | Right ventricular stimulus, delay                                        | $RV_t = 0\text{ms}$                                 |
|                             | Right ventricular stimulus, radius                                       | $RV_r = 19.29\text{mm}$                             |
|                             |                                                                          |                                                     |
| Repolarization              | Minimum action potential duration at 90% repolarization                  | $APD_{90,min} = 215.29\text{ms}$                    |
|                             | Maximum action potential duration at 90% repolarization                  | $APD_{90,max} = 381.36\text{ms}$                    |
|                             | $g_{Ks}$ scaling factor in apico-basal direction                         | $f_{gKs,ab} = 0.9957$                               |
|                             | $g_{Ks}$ scaling factor in transmural direction                          | $f_{gKs,tm} = 0.2276$                               |
|                             | $g_{Ks}$ scaling factor in transventricular direction                    | $f_{gKs,tv} = 0.5751$                               |
|                             | $g_{Ks}$ scaling factor in circumferential direction                     | $f_{gKs,rot} = 0.4956$                              |
| Forward calculation         | Torso conductivity                                                       | $g_{Torso} = 0.2\text{ S/m}$                        |

1. Gillette, K.; Gsell, M. A. F.; Prassl, A. J.; Karabelas, E.; Reiter, U.; Reiter, G.; Grandits, T.; Payer, C.; Stern, D.; Urschler, M.; Bayer, J. D.; Augustin, C. M.; Neic, A.; Pock, T.; Vigmond, E. J.; Plank, G., A Framework for the generation of digital twins of cardiac electrophysiology from clinical 12-leads ECGs. *Medical image analysis* **2021**, 71, 102080.
